# Supplementary material for: The combined effects of light intensity, temperature, and water potential on wall deposition in regulating hypocotyl elongation of Brassica rapa
Source: PeerJ. 2020 May 26;8:e9106. doi: 10.7717/peerj.9106 (PMC7258941; doi:10.7717/peerj.9106)
Supplement: Data S1 [file peerj-08-9106-s016.xlsx]

## Sheet: hypocoty length
Hypocotyl length	0 d	1 d	2 d	3 d	4 d	5 d	6 d	7 d	8 d
LhTlWl	0.826667	0.926667	0.961667	1.02167	1.07333	1.11167	1.16333	1.20667	1.205
LhTlWh	0.826667	1.1	1.135	1.18167	1.255	1.30667	1.36	1.42	1.46333
LhThWl	0.826667	1.13333	1.22833	1.355	1.42667	1.47	1.50667	1.54167	1.55167
LhThWh	0.826667	1.26333	1.4	1.50667	1.59667	1.68667	1.73333	1.75333	1.76
LlTlWl	0.826667	1.33833	1.67667	1.96167	2.14	2.22	2.28833	2.35	2.37667
LlTlWh	0.826667	1.49167	1.76167	2.03	2.21167	2.35	2.45	2.53315	2.56167
LlThWl	0.826667	1.48167	2.02852	2.41667	2.58333	2.69815	2.8	2.87778	2.88333
LlThWh	0.826667	1.96	2.58	3.05667	3.40333	3.55	3.65	3.72648	3.74722
SE	0 d	1 d	2 d	3 d	4 d	5 d	6 d	7 d	8 d
LhTlWl	0.048823	0.0606442	0.0548262	0.0584573	0.0594537	0.0560277	0.0548959	0.0517743	0.0515202
LhTlWh	0.0429032	0.0559475	0.061669	0.0599922	0.0614789	0.0606551	0.0618549	0.0571411	0.056554
LhThWl	0.0436942	0.0454573	0.0503284	0.051075	0.054422	0.061431	0.0559091	0.0585531	0.0575224
LhThWh	0.0512509	0.0713826	0.0699104	0.0783321	0.0757908	0.075591	0.0753335	0.0728863	0.0740297
LlTlWl	0.0458716	0.0494346	0.0681598	0.0826454	0.132336	0.0842344	0.0874214	0.0856023	0.0812539
LlTlWh	0.0543431	0.075906	0.093289	0.105697	0.108258	0.112703	0.121322	0.112146	0.119044
LlThWl	0.0468232	0.0674508	0.119301	0.131647	0.14092	0.143081	0.148074	0.134982	0.139582
LlThWh	0.0622854	0.0972573	0.123971	0.145217	0.227468	0.161358	0.179658	0.164101	0.171112

## Sheet: Cell length
Epeidemis	Cell length	1	2	3	Average		SE	1	2	3	Average
	LhTlWl	87.3467	86.386	87.0876	86.9401		LhTlWl	2.36789	2.31394	2.27086	2.31756
	LhTlWh	91.852	95.218	93.4604	93.5101		LhTlWh	1.94873	2.25391	1.43249	1.87837
	LhThWl	96.3556	99.78	95.4568	97.1975		LhThWl	2.41104	1.66514	1.32282	1.79967
	LhThWh	107.809	105.508	104.972	106.096		LhThWh	2.92202	2.61524	2.39476	2.64401
	LlTlWl	108.791	111.41	105.335	108.512		LlTlWl	2.61146	2.5274	2.03302	2.39063
	LlTlWh	123.904	118.809	119.714	120.809		LlTlWh	3.2678	2.49396	3.3027	3.02149
	LlThWl	133.023	127.667	126.684	129.125		LlThWl	3.51823	2.03453	3.24004	2.93094
	LlThWh	184.848	180.446	181.892	182.395		LlThWh	5.2754	8.56989	6.72397	6.85642
Cortex	Cell length	1	2	3	Average		SE	1	2	3	Average
	LhTlWl	80.1448	79.0776	79.2136	79.4787		LhTlWl	3.45993	2.78981	3.62408	3.29127
	LhTlWh	95.7948	97.8242	90.5332	94.7174		LhTlWh	4.99314	4.29791	2.57887	3.95664
	LhThWl	95.0892	91.1204	96.4896	94.2331		LhThWl	3.83857	3.60438	3.46014	3.63436
	LhThWh	116.119	106.12	109.402	110.547		LhThWh	4.21449	4.41153	4.78524	4.47042
	LlTlWl	131.668	129.908	125.428	129.002		LlTlWl	4.75942	6.34008	5.76878	5.62276
	LlTlWh	153.514	149.55	148.84	150.635		LlTlWh	9.52616	10.9992	8.21205	9.57915
	LlThWl	163.749	155.546	157.35	158.882		LlThWl	11.6786	5.18948	11.6531	9.50707
	LlThWh	194.344	189.522	186.971	190.279		LlThWh	10.8678	9.18683	8.16532	9.40666

## Sheet: Wall thickness
		Cell wall thickness (μm)		LhTlWl	LhTlWh	LhThWl	LhThWh	LlTlWl	LlTlWh	LlThWl	LlThWh
		OE	0 d	1.19 ± 0.06	1.19 ± 0.06	1.19 ± 0.06	1.19 ± 0.06	1.19 ± 0.06	1.19 ± 0.06	1.19 ± 0.06	1.19 ± 0.06
			2 d	1.88 ± 0.09	1.65 ± 0.08	1.57 ± 0.08	1.47 ± 0.10	1.47 ± 0.09	1.28 ± 0.06	1.30 ± 0.15	1.14 ± 0.12
			5 d	1.90 ± 0.12	1.65 ± 0.11	1.63 ± 0.06	1.45 ± 0.08	1.31 ± 0.11	1.11 ± 0.05	0.88 ± 0.06	0.83 ± 0.05
			8 d	2.21 ± 0.17	1.78 ± 0.19	1.80 ± 0.22	1.72 ± 0.20	1.78 ± 0.12	1.59 ± 0.09	1.49 ± 0.21	1.20 ± 0.13
		IE	0 d	0.50 ± 0.04	0.50 ± 0.04	0.50 ± 0.04	0.50 ± 0.04	0.50 ± 0.04	0.50 ± 0.04	0.50 ± 0.04	0.50 ± 0.04
			2 d	0.78 ± 0.04	0.67 ± 0.07	0.67 ± 0.08	0.51 ± 0.03	0.58 ± 0.03	0.48 ± 0.02	0.47 ± 0.03	0.41 ± 0.02
			5 d	0.67 ± 0.06	0.55 ± 0.03	0.56 ± 0.05	0.47 ± 0.08	0.46 ± 0.06	0.39 ± 0.07	0.41 ± 0.03	0.28 ± 0.01
			8 d	0.89 ± 0.06	0.68 ± 0.06	0.70 ± 0.10	0.59 ± 0.06	0.57 ± 0.06	0.48 ± 0.04	0.44 ± 0.04	0.37 ± 0.03
		CO	0 d	0.36 ± 0.03	0.36 ± 0.03	0.36 ± 0.03	0.36 ± 0.03	0.36 ± 0.03	0.36 ± 0.03	0.36 ± 0.03	0.36 ± 0.03
			2 d	0.49 ± 0.03	0.42 ± 0.06	0.45 ± 0.05	0.37 ± 0.02	0.39 ± 0.05	0.33 ± 0.03	0.30 ± 0.02	0.28 ± 0.03
			5 d	0.41 ± 0.04	0.30 ± 0.04	0.29 ± 0.08	0.27 ± 0.03	0.27 ± 0.02	0.24 ± 0.02	0.22 ± 0.02	0.17 ± 0.02
			8 d	0.49 ± 0.04	0.42 ± 0.05	0.43 ± 0.03	0.34 ± 0.04	0.32 ± 0.07	0.26 ± 0.02	0.28 ± 0.03	0.23 ± 0.02
		OE represents outter epidermis; IE represents inner epidermis; CO represents cortex

## Sheet: Contents in wall components
	Wall mass (mg)	1	2	3	Average	SE
	LhTlWl	51.4593	44.6886	46.4625	47.5368	2.02699
	LhTlWh	45.633	43.9731	41.8391	43.8151	1.09805
	LhThWl	43.108	45.3575	41.2196	43.2284	1.19602
	LhThWh	38.4196	38.0207	33.8939	36.7781	1.44667
	LlTlWl	28.7661	25.7019	26.7928	27.0869	0.89671
	LlTlWh	24.0156	22.7455	22.4927	23.0846	0.471191
	LlThWl	24.4212	21.0824	21.7632	22.4223	1.01859
	LlThWh	21.0389	18.4374	19.604	19.6934	0.752325
	Cellulose (mg g-1)	1	2	3	Average	SE
	LhTlWl	10.7527	10.989	11.6156	11.1191	0.257462
	LhTlWh	11.7763	13.4506	10.5747	11.9339	0.833927
	LhThWl	10.644	12.2732	9.03444	10.6505	0.934958
	LhThWh	10.3542	12.0212	9.31436	10.5633	0.788371
	LlTlWl	9.46253	7.90826	7.48621	8.28567	0.600911
	LlTlWh	6.14354	5.88708	5.02779	5.68613	0.337396
	LlThWl	6.02601	5.66394	7.00848	6.23281	0.401674
	LlThWh	5.77174	4.38116	4.65839	4.93709	0.424925
	Hemicellulose (mg g-1)	1	2	3	Average	SE
	LhTlWl	1.35019	1.42444	1.24166	1.33876	0.0530734
	LhTlWh	1.3709	1.28972	1.1045	1.25504	0.0788337
	LhThWl	1.32971	1.32971	1.32971	1.32971	0.110994
	LhThWh	1.37165	1.33728	0.91262	1.20718	0.147615
	LlTlWl	0.895629	0.813199	0.964983	0.89127	0.0438703
	LlTlWh	0.787789	0.687994	0.773693	0.749825	0.0311822
	LlThWl	0.836051	0.740971	0.744382	0.773801	0.0311403
	LlThWh	0.649711	0.61872	0.598333	0.622255	0.0149364
	Pectin (mg g-1)	1	2	3	Average	SE
	LhTlWl	4.12403	4.24838	3.9419	4.10477	0.0889956
	LhTlWh	3.93243	4.06119	4.09979	4.03114	0.0505976
	LhThWl	3.93874	3.74981	3.72699	3.80518	0.0671045
	LhThWh	3.07202	2.95949	3.00039	3.01063	0.0328883
	LlTlWl	2.51852	2.59497	2.43725	2.51691	0.045535
	LlTlWh	2.16037	2.1145	1.94002	2.07163	0.0671243
	LlThWl	2.24298	2.09458	2.33646	2.22467	0.0704219
	LlThWh	1.74468	1.65734	1.91177	1.77126	0.0746394

## Sheet: valume in hypocotyl and wall
		Condition	Volume (mm3)
			HY	OE	IE	CO	TCW
		LhTlWl	4.799 f	0.060 g	0.030 h	0.038 c	0.128 g
		LhTlWh	6.237 e	0.060 g	0.039 f	0.035 d	0.134 f
		LhThWl	6.540 e	0.064 f	0.035 g	0.039 c	0.138 f
		LhThWh	8.608 d	0.075 e	0.040 e	0.037 cd	0.152 e
		LlTlWl	8.520 d	0.090 c	0.052 c	0.047 b	0.188 c
		LlTlWh	14.135 b	0.107 b	0.068 b	0.048 b	0.224 b
		LlThWl	9.111 c	0.085 d	0.044 d	0.036 d	0.165 d
		LlThWh	19.202 a	0.114 a	0.079 a	0.067 a	0.259 a
		HY repesents hypocotyl; OE represents outter epidermis; IE represents inner epidermis; CO represents cortex

## Sheet: cell wall bosynthesis
CesA1	Bra023952						CesA3	Bra028768					ANOVA
Treatment	1	2	3	Average	SE	ANOVA	Treatment	1	2	3	Average	SE	ANOVA
LhTlWl	1.17283	0.97942	0.870551	1.0076	0.0883923	ab	LhTlWl	0.852635	1.11729	1.04972	1.00655	0.0793893	D	d
LhTlWh	1.11729	1.21419	1.06437	1.13195	0.0438677	a	LhTlWh	1.28046	1.45062	1.38191	1.371	0.0494212	BC	bc
LhThWl	0.922316	1.0163	1.05214	0.996922	0.0387111	ab	LhThWl	1.74917	1.57518	1.4012	1.57518	0.100448	AB	ab
LhThWh	0.99	0.95	0.864537	0.934846	0.0370021	b	LhThWh	1.00928	1.32256	1.1355	1.15578	0.0910014	CD	cd
LlTlWl	1.16743	0.890899	0.915945	0.991424	0.0882985	ab	LlTlWl	1.57644	1.60956	1.68958	1.62519	0.0335847	A	a
LlTlWh	1.08423	1.01866	0.844791	0.982558	0.0714368	ab	LlTlWh	1.73307	1.39797	1.25122	1.46075	0.142598	AB	ab
LlThWl	1.09682	0.903335	0.981686	0.993949	0.0561912	ab	LlThWl	1.6358	1.55833	1.54756	1.58057	0.0277933	AB	ab
LlThWh	1.00231	0.948246	1.05214	1.0009	0.0300013	ab	LlThWh	1.50177	1.50177	1.59844	1.534	0.0322231	AB	ab
CesA6	Bra024324						CSLC4	Bra039061
Treatment	1	2	3	Average	SE	ANOVA	Treatment	1	2	3	Average	SE	ANOVA
LhTlWl	1.13	0.98	0.96	1.02333	0.0536449	b	LhTlWl	0.897095	0.831238	1.34102	1.02312	0.160085	e
LhTlWh	1.03049	1.08172	0.897095	1.0031	0.055029	bc	LhTlWh	1.16473	1.13288	1.1487	1.14877	0.06	de
LhThWl	1.04729	0.937354	0.862542	0.949064	0.0536537	bc	LhThWl	1.79834	1.51222	1.65528	1.65528	0.0825965	cd
LhThWh	0.668964	0.554785	0.678302	0.634017	0.0397077	bc	LhThWh	0.754364	0.733736	1.08172	1.08172	0.112716	e
LlTlWl	2.15348	2.05148	1.92741	2.04412	0.0653618	a	LlTlWl	2.28153	2.86791	3.16017	2.76987	0.258335	a
LlTlWh	1.91853	2.31338	1.18921	1.80704	0.13	a	LlTlWh	1.8489	2.56093	2.17598	2.19527	0.205771	bc
LlThWl	2.24492	2.09459	1.88775	2.07575	0.103537	a	LlThWl	1.76541	2.12874	2.31338	2.06917	0.160965	b
LlThWh	1.73775	1.78592	1.68958	1.73775	0.02781	a	LlThWh	1.74917	2.38943	2.63293	2.25717	0.263551	ab
CSLC5	Bra011284						CSLC6	Bra001246
Treatment	1	2	3	Average	SE	ANOVA	Treatment	1	2	3	Average	SE	ANOVA
LhTlWl	1.39152	0.730353	0.983957	1.03528	0.192581	d	LhTlWl	1.09936	0.868541	1.04729	1.00507	0.0698974	bc
LhTlWh	0.743979	0.866537	1.61702	1.07584	0.12	d	LhTlWh	0.728668	1.0163	0.872564	0.872512	0.0830337	cd
LhThWl	1.45783	1.65864	1.25701	1.45783	0.115939	ab	LhThWl	0.838956	0.725309	0.833161	0.799142	0.0369545	d
LhThWh	2.00926	0.735433	1.33484	1.35985	0.17	bc	LhThWh	0.782773	0.653685	0.80478	0.747079	0.0471275	d
LlTlWl	1.10445	1.52979	2.41719	1.68	0.19	a	LlTlWl	1.27	1.25	1.23	1.25	0.03	a
LlTlWh	0.473029	1.79005	2.94854	1.47	0.13	ab	LlTlWh	1.11729	1.30134	1.09429	1.17097	0.0655209	a
LlThWl	0.638754	0.775572	1.15136	0.855227	0.153241	e	LlThWl	1.17827	1.12246	1.11471	1.13848	0.0200194	ab
LlThWh	0.503478	0.479632	1.07923	0.77943	0.15	e	LlThWh	1.00696	0.959264	0.939523	0.968581	0.0200158	c
XXT1	Bra007696						XXT2	Bra036262
Treatment	1	2	3	Average	SE	ANOVA	Treatment	1	2	3	Average	SE	ANOVA
LhTlWl	0.897095	1.00231	1.11214	1.00385	0.125254	e	LhTlWl	0.788218	1.03288	1.2283	1.01647	0.127306	d
LhTlWh	1.74513	1.49831	1.50873	1.58405	0.0310353	d	LhTlWh	1.2283	1.21139	1.19472	1.21147	0.06	d
LhThWl	2.16345	2.71948	2.45094	2.44462	0.0931292	ab	LhThWl	1.78592	1.86176	1.86176	1.83648	0.0252801	c
LhThWh	2.03731	1.94082	1.94082	1.97298	0.0868791	c	LhThWh	2.15846	2.12874	2.15846	2.14855	0.05	bc
LlTlWl	2.26054	1.87471	2.59668	2.24397	0.0271725	bc	LlTlWl	3.09513	3.31728	2.58471	2.99904	0.216865	a
LlTlWh	1.59844	1.4406	1.5874	1.54215	0.0508749	d	LlTlWh	2.28153	2.05623	2.23457	2.19078	0.13	bc
LlThWl	2.85469	2.45094	2.53737	2.61433	0.096101	a	LlThWl	2.69	1.9	2.74942	2.77952	0.273774	b
LlThWh	2.4005	2.2868	2.36745	2.35158	0.109517	ab	LlThWh	1.8489	1.9141	1.90088	1.88796	0.0198996	c
XXT5	Bra003804						XLT2	Bra010065
Treatment	1	2	3	Average	SE	ANOVA	Treatment	1	2	3	Average	SE	ANOVA
LhTlWl	0.768438	1.15669	1.12506	1.01673	0.0561881	ef	LhTlWl	1.04006	1.01866	0.943874	1.00086	0.0610041	b
LhTlWh	0.952638	0.852635	0.858565	0.887946	0.0359259	f	LhTlWh	0.651423	0.563179	0.525465	0.580023	0.0169091	d
LhThWl	1.51222	1.34412	1.29834	1.38489	0.0401772	bc	LhThWl	0.772889	0.869545	0.863539	0.835325	0.0988164	c
LhThWh	1.34102	1.25122	1.1355	1.24258	0.0160804	cd	LhThWh	0.765779	0.70466	0.771105	0.747182	0.0314996	c
LlTlWl	1.2086	1.10445	1.217	1.71	0.0351144	de	LlTlWl	0.92445	0.695762	0.740549	0.78692	0.0504005	c
LlTlWh	1.41421	1.37554	1.22264	1.33747	0.0584878	cd	LlTlWh	0.780065	0.642455	0.679086	0.700535	0.0411469	cd
LlThWl	1.83189	1.75727	1.63959	1.74292	0.0780112	a	LlThWl	1.88122	1.69545	1.76745	1.78137	0.0686107	a
LlThWh	1.63959	1.60585	1.47768	1.57437	0.0744069	ab	LlThWh	1.88775	1.68958	1.59844	1.72526	0.101544	a
MUR3	Bra036680						GAUT1	Bra014453
Treatment	1	2	3	Average	SE	ANOVA	Treatment	1	2	3	Average	SE	ANOVA
LhTlWl	1.03049	1.02337	0.948246	1.0007	0.0263093	c	LhTlWl	0.983957	0.943874	1.07674	1.00152	0.0393471	cd
LhTlWh	0.797377	0.764895	0.770215	0.777496	0.0100585	d	LhTlWh	0.838956	0.990801	0.740549	0.856768	0.0727884	d
LhThWl	1.38511	1.28343	1.31039	1.32631	0.0304132	b	LhThWl	1.41748	1.52979	1.37872	1.442	0.0452989	a
LhThWh	1.20303	1.19472	1.4811	1.29295	0.0941064	b	LhThWh	1.31951	1.38511	1.18099	1.2952	0.0601635	ab
LlTlWl	1.08423	1.05458	1.00463	1.04781	0.0232249	c	LlTlWl	1.14076	1.32869	1.02811	1.16585	0.0876699	bc
LlTlWh	1.03766	1.10445	0.988514	1.04354	0.033598	c	LlTlWh	1.19196	1.24258	0.948246	1.12759	0.0908562	bc
LlThWl	1.73708	1.57644	1.86176	1.72509	0.0825836	a	LlThWl	1.08423	1.08423	1.03288	1.06711	0.0171171	c
LlThWh	1.63203	1.46071	1.68958	1.59411	0.0687377	a	LlThWh	1.04247	1.07923	0.965936	1.02921	0.0333694	cd
GAUT7	Bra005091						RGXT1	Br037376
Treatment	1	2	3	Average	SE	ANOVA	Treatment	1	2	3	Average	SE	ANOVA
LhTlWl	0.831238	1.1355	1.05946	1.00874	0.0914231	cd	LhTlWl	1.06437	0.920188	1.02101	1.00186	0.0427097	c
LhTlWh	1	0.959264	1.21419	1.05782	0.079067	cd	LhTlWh	1.17283	0.846745	1.04972	1.0231	0.0950701	bc
LhThWl	0.838956	0.782773	1.17827	0.933332	0.123537	d	LhThWl	1.28046	0.963707	1.10701	1.11706	0.0915778	bc
LhThWh	1.29235	1.05702	1.16878	1.17272	0.0679638	bc	LhThWh	1.07425	0.903335	0.961483	0.97969	0.0501724	c
LlTlWl	0.986233	1.02811	1.38511	1.13315	0.126558	cd	LlTlWl	0.974905	0.890899	0.903335	0.923046	0.0261767	c
LlTlWh	1.39474	1.46409	1.43	1.42941	0.0200183	ab	LlTlWh	1.09177	0.82169	0.856584	0.923348	0.13	c
LlThWl	1.07177	1.19748	1.54756	1.27227	0.142349	bc	LlThWl	1.37554	1.05702	1.20581	1.21279	0.0920161	ab
LlThWh	1.54756	1.59107	1.56932	1.56932	0.0125597	a	LlThWh	1.3692	1.25122	1.38831	1.33624	0.0428694	a
RGXT2	Bra067375
Treatment	1	2	3	Average	SE	ANOVA
LhTlWl	1	1	1	1	0.12	e
LhTlWh	1.76949	1.13366	1.58838	1.49718	0.189127	de
LhThWl	1.35035	2.49026	2.22427	2.02163	0.14	cd
LhThWh	2.36199	2.87055	2.22264	2.48506	0.196899	bc
LlTlWl	1.79554	2.52626	2.26576	2.19585	0.213818	bc
LlTlWh	2.55833	2.61328	2.65975	2.61046	0.0293129	b
LlThWl	2.46071	2.32344	2.76137	2.51517	0.129318	bc
LlThWh	3.17555	3.52979	3.27101	3.32545	0.105822	a

## Sheet: cell wall extension
XTH17	Bra011181							XTH18	Bra011180
Treatment	1	2	3	Average	SE	ANOVA		Treatment	1	2	3	Average	SE	ANOVA
LhTlWl	1.04972	1.03526	0.920188	1.00172	0.0409806	cd		LhTlWl	0.993092	0.993092	1.01396	1.00005	0.00695566	c
LhTlWh	0.941696	0.954842	0.974905	0.957147	0.00965565	d		LhTlWh	1.96337	1.96337	2.07532	2.00069	0.0373159	b
LhThWl	0.703847	0.733736	0.608502	0.656174	0.0377622	e		LhThWl	0.733736	0.679871	0.698985	0.704197	0.0157664	d
LhThWh	1.04006	1.04729	0.899171	0.995508	0.0482141	cd		LhThWh	3.26406	3.28676	3.47417	3.34166	0.0665755	a
LlTlWl	1.76949	1.87038	1.79419	1.81135	0.0303632	b		LlTlWl	0.508152	0.504642	0.591862	0.534886	0.0285063	de
LlTlWh	1.96337	2.16345	2.03261	2.05314	0.0586629	a		LlTlWh	1.80667	1.80667	2.00463	1.87266	0.0659853	b
LlThWl	1.04247	1.05702	1.14076	1.08008	0.03063	c		LlThWl	0.279322	0.312083	0.403321	0.331575	0.0370986	e
LlThWh	1.83613	1.79834	1.8489	1.82779	0.0151787	b		LlThWh	3.04547	3.74942	3.80176	3.53222	0.24384	a
XTH22	Bra002719							XTH31	Bra019416
Treatment	1	2	3	Average	SE	ANOVA		Treatment	1	2	3	Average	SE	ANOVA
LhThWl	1.79419	1.42734	1.49831	1.57328	0.112339	de		LhThWl	1.00696	0.993092	1	1.00002	0.00490134	f
LhThWh	2.00926	1.72508	1.72508	1.81981	0.0947264	cde		LhThWh	0.918064	0.911722	0.92445	0.918079	0.00449974	g
LhTlWl	1.00696	1.02101	0.972655	1.00021	0.0143615	e		LhTlWl	1.19196	1.2086	1.17555	1.19203	0.0116847	e
LhTlWh	1.15936	0.954842	0.941696	1.01863	0.0704672	e		LhTlWh	0.833161	0.886791	0.827406	0.849119	0.0231589	g
LlThWl	3.24901	3.97237	3.50642	3.57593	0.211689	b		LlThWl	2.7007	2.57279	2.57279	2.61543	0.0522193	a
LlThWh	10.9789	13.8967	11.8488	12.2415	0.864856	a		LlThWh	1.50177	1.37237	1.33484	1.40299	0.0619279	d
LlTlWl	2.36745	2.53737	2.97592	2.62691	0.181265	bc		LlTlWl	2.26054	2.18354	2.21402	2.21936	0.0274206	b
LlTlWh	2.1785	2.25532	2.33486	2.25622	0.045139	cd		LlTlWh	1.81504	1.81504	1.75321	1.79443	0.0252407	c
XTH33	Bra018433							EXPA20	Bra011901
Treatment	1	2	3	Average	SE	ANOVA		Treatment	1	2	3	Average	SE	ANOVA
LhThWl	0.814131	1.10445	1.11214	1.01024	0.120123	d		LhThWl	0.97942	0.939523	1.08673	1.00189	0.0538359	de
LhThWh	1.22264	1.34723	1.47427	1.34805	0.0889657	c		LhThWh	0.823591	0.795536	0.920188	0.846438	0.0462384	e
LhTlWl	0.478525	0.605696	0.565135	0.549785	0.0459338	e		LhTlWl	1.52274	1.5874	1.62076	1.57696	0.0352393	b
LhTlWh	1.01396	1.21419	1.05702	1.09506	0.0745279	cd		LhTlWh	1.48796	1.45734	1.51922	1.48817	0.0218807	b
LlThWl	1.36289	1.25411	1.35347	1.32349	0.0426158	c		LlThWl	1.18646	1.13813	1.33484	1.21981	0.0724834	c
LlThWh	3.36359	2.86791	3.20428	3.14526	0.178936	a		LlThWh	1.13288	1.16473	1.24833	1.18198	0.0421612	cd
LlTlWl	2.01391	1.71713	2.05623	1.92909	0.130657	b		LlTlWl	1.84038	1.85318	2.11404	1.93586	0.109202	a
LlTlWh	3.25653	3.12657	2.99661	3.12657	0.0918924	a		LlTlWh	1.69349	1.72907	2.02792	1.81683	0.129877	a
